# Supplementary material for: Scalable nanomanufacturing of chalcogenide inks: a case study on thermoelectric V–VI nanoplates
Source: Royal Society of Chemistry journal article supplement (doi:10.1039/d1ta05858d), 2021-01-01
Supplement: d1ta05858d1.pdf [file d1ta05858d1.pdf]

Supporting Information

## **Scalable nanomanufacturing of chalcogenide inks: a case study on thermoelectric V–VI nanoplates**

**Minxiang Zeng,<sup>a</sup> Hongyao Xie,<sup>b</sup> Mortaza Saeidi-Javash,<sup>a</sup> Newaz Mohammad Tanvir,<sup>a</sup> Yipu Du,<sup>a</sup> Jiahao Chen,<sup>a</sup> Mercuri G. Kanatzidis,<sup>b</sup> and Yanliang Zhang<sup>a,\*</sup>**

<sup>a</sup>*Department of Aerospace and Mechanical Engineering, University of Notre Dame, Notre Dame, IN 46556, USA*

<sup>b</sup>*Department of Chemistry, Northwestern University, Evanston, Illinois 60208, United States*

*\*Corresponding Authors: yzhang45@nd.edu.*

# Table of Contents

|                                                                                                                                                                                                                                                                                                                                              |    |
|----------------------------------------------------------------------------------------------------------------------------------------------------------------------------------------------------------------------------------------------------------------------------------------------------------------------------------------------|----|
| <b>Materials characterization</b> .....                                                                                                                                                                                                                                                                                                      | 3  |
| <b>Densification</b> .....                                                                                                                                                                                                                                                                                                                   | 3  |
| <b>Thermoelectric properties measurements</b> .....                                                                                                                                                                                                                                                                                          | 3  |
| <b>Figure S1.</b> XRD (a) and SEM images (b) of Bi <sub>2</sub> Se <sub>3</sub> nanoplates. ....                                                                                                                                                                                                                                             | 4  |
| <b>Figure S2.</b> Thermoelectric properties of n-type Bi <sub>2</sub> Te <sub>2.7</sub> Se <sub>0.3</sub> showing a peak zT of 0.7 at 375 K. 5                                                                                                                                                                                               |    |
| <b>Figure S3.</b> Sedimentation analyses of water-based and EG-based inks (Bi <sub>2</sub> Te <sub>2.7</sub> Se <sub>0.3</sub> particle concentration: 3.5 wt%). ....                                                                                                                                                                        | 6  |
| <b>Figure S4.</b> Optical microscopy of printed chalcogenide films using extrusion printing (a) and aerosol jet printing (b) showing no significant coffee-ring effect. ....                                                                                                                                                                 | 7  |
| <b>Table S1:</b> Comparison of various synthesis methods under ambient pressure. *Abbreviations: the hydrazine-assisted colloidal synthesis (HCS), ethylene-assisted colloidal synthesis (ECS), and solvent engineering colloidal synthesis (SCS). Abbreviations of EG and DEG are ethylene glycol and diethylene glycol, respectively. .... | 8  |
| <b>Table S2:</b> Comparison of printed thermoelectric materials with processing methods. *The thermal conductivity data are not always readily available for printed TE materials, and thus we here focus on Seebeck coefficient (S), electrical conductivity (σ), and power factor (PF). ....                                               | 9  |
| <b>Table S3.</b> Aerosol jet printing parameters of Bi <sub>2</sub> Te <sub>2.7</sub> Se <sub>0.3</sub> TE films. ....                                                                                                                                                                                                                       | 9  |
| <b>References</b> .....                                                                                                                                                                                                                                                                                                                      | 10 |

### **Materials characterization**

A transmission electron microscope (Titan 80-300) was used to image the samples. A focused ion beam-scanning electron microscope (FIB-SEM, Helios G4 UX) was used to obtain SEM images of samples. A confocal Raman microscope (NRS-5100, Jasco) with high-Speed XYZ imaging capability was used to characterize materials and molecules structure and composition. To map the elemental distribution of combinatorial films, Energy dispersive X-Ray spectroscopy (Helios G4 UX and Titan 80-300) and X-ray fluorescence imaging (EDAX Orbis PC Micro-XRF) were used depending the sample compositions and dimensions.

### **Densification**

The  $\text{Bi}_2\text{Te}_{2.7}\text{Se}_{0.3}$  nanoplates were dried at 380 °C for 60 min under  $\text{H}_2/\text{Ar}$  airflow, then sintered by spark plasma sintering (SPS) at 480 °C under a pressure of 45 MPa in a vacuum for 15 min to obtain fully densified bulk sample with the size of 12.7 mm in diameter and 7 mm in length. The density of the sample achieved was 6.5715  $\text{g}/\text{cm}^3$ , (theoretical density is 7.77  $\text{g}/\text{cm}^3$ ).

### **Thermoelectric properties measurements**

The sintered samples were cut and polished into two regular shapes with size of  $3 \times 3 \times 12 \text{ mm}^3$  and  $6 \times 6 \times 1.5 \text{ mm}^3$  for electrical properties and thermal conductivity measurement, respectively. The electrical conductivity and the Seebeck coefficient were simultaneously measured under a He atmosphere from 300 to 525 K by the ZEM-3 apparatus (Ulvac Riko, Inc.). The thermal conductivity was determined based on the thermal diffusivity ( $D$ ) which was measured in an Ar atmosphere by the laser flash diffusivity method (LFA 457; Netzsch), where the heat capacity ( $C_p$ ) was calculated by the Dulong-Petit law and the sample densities were determined by measuring the mass and dimensions of the sample. The lattice thermal conductivity was obtained by subtracting the electronic thermal conductivity from the measured total thermal conductivity.

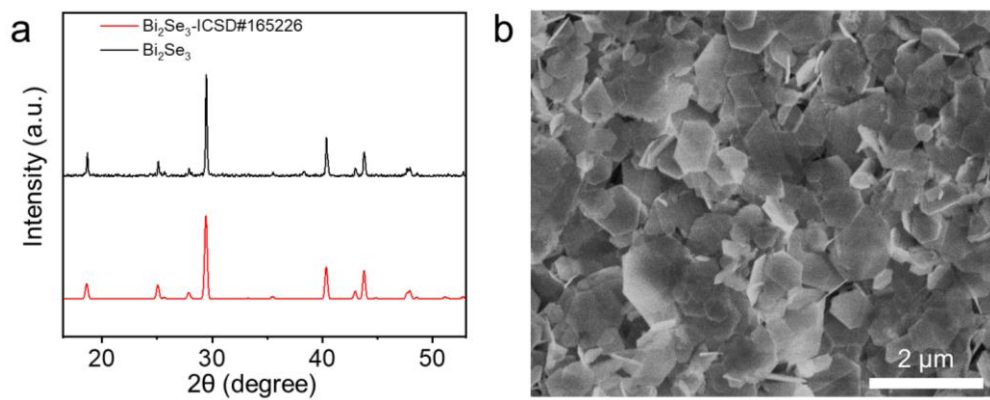

**Figure S1.** XRD (a) and SEM images (b) of  $\text{Bi}_2\text{Se}_3$  nanoplates.

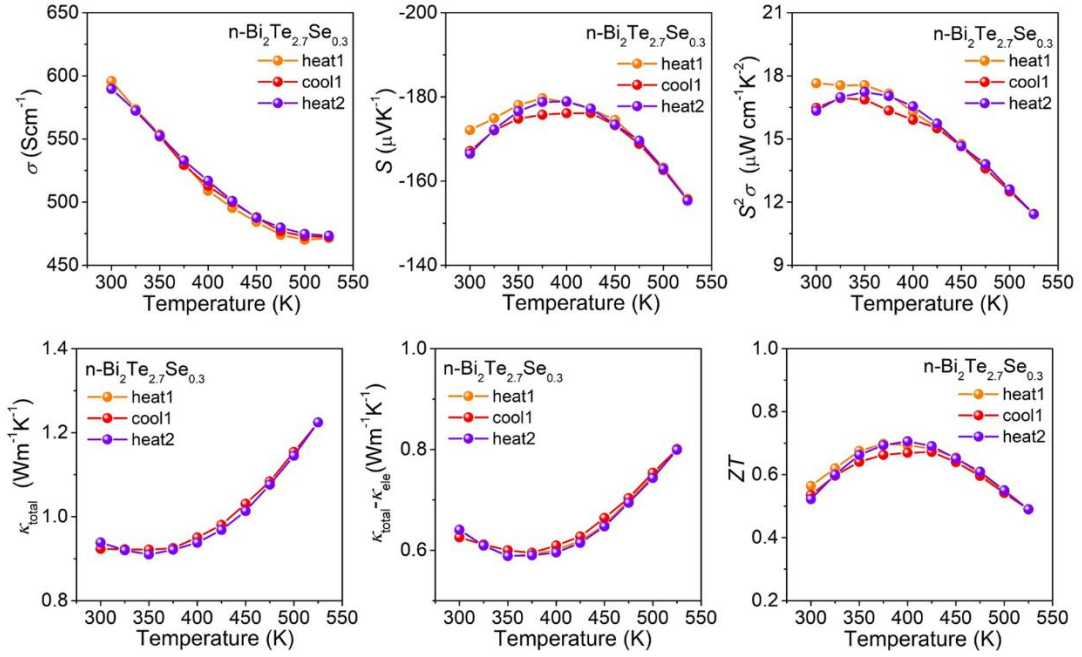

**Figure S2.** Thermoelectric properties of n-type Bi<sub>2</sub>Te<sub>2.7</sub>Se<sub>0.3</sub> showing a peak  $zT$  of 0.7 at 375-400 K region.

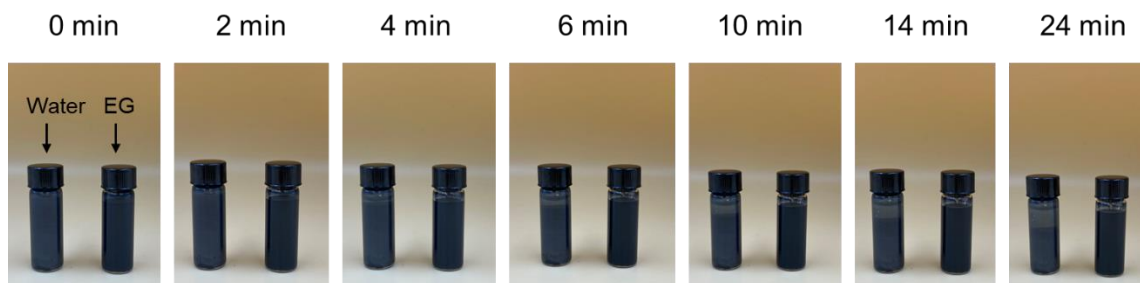

**Figure S3.** Sedimentation analyses of water-based and EG-based inks ( $\text{Bi}_2\text{Te}_{2.7}\text{Se}_{0.3}$  particle concentration: 3.5 wt%).

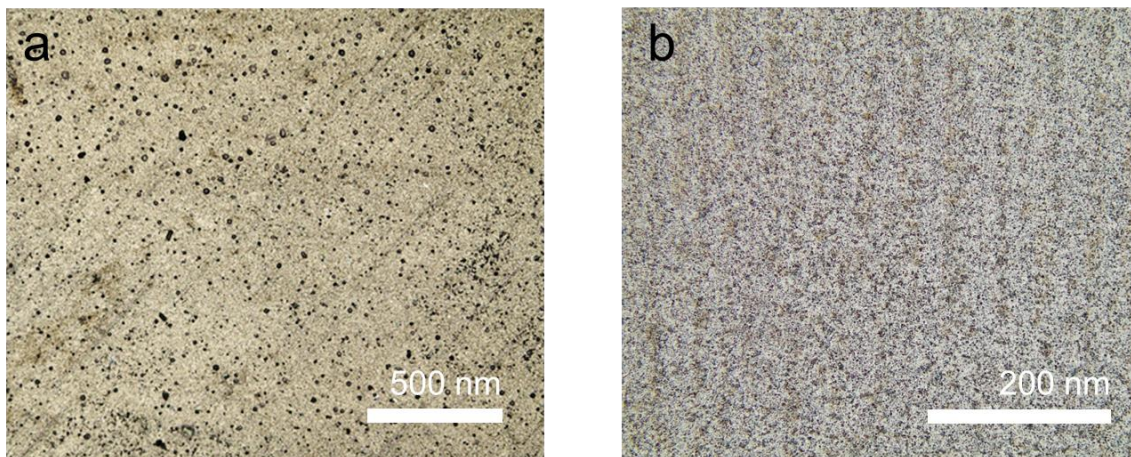

**Figure S4.** Optical microscopy of printed chalcogenide films using extrusion printing (a) and aerosol jet printing (b) showing no significant coffee-ring effect.

**Table S1:** Comparison of various synthesis methods under ambient pressure. \*Abbreviations: the hydrazine-assisted colloidal synthesis (HCS), ethylene-glycol-assisted colloidal synthesis (ECS), and solvent engineering colloidal synthesis (SCS). Abbreviations of EG and DEG are ethylene glycol and diethylene glycol, respectively.

| Method* | Sb precursor                   | Te precursor                     | Reducing agent | Solvent | T @ 1 atm | Reference        |
|---------|--------------------------------|----------------------------------|----------------|---------|-----------|------------------|
| SCS     | SbCl <sub>3</sub>              | Na <sub>2</sub> TeO <sub>3</sub> | EG             | EG/DEG  | ~191 °C   | <i>This work</i> |
| HCS     | SbCl <sub>3</sub>              | TeO <sub>2</sub>                 | Hydrazine      | EG      | ~155 °C   | <sup>1</sup>     |
| ECS     | Sb <sub>2</sub> O <sub>3</sub> | TeO <sub>2</sub>                 | EG             | EG      | ~180 °C   | <sup>2</sup>     |



**Table S2:** Comparison of printed thermoelectric materials with processing methods. \*The thermal conductivity data are not always readily available for printed TE materials, and thus we here focus on Seebeck coefficient (S), electrical conductivity ( $\sigma$ ), and power factor (PF).

| Ref.             | Materials                                       | Fabrication          | Post-treatment               | S<br>( $\mu\text{V/K}$ ) | $\sigma$<br>(S/cm) | PF*<br>$\mu\text{W}/(\text{m}\cdot\text{K}^2)$ |
|------------------|-------------------------------------------------|----------------------|------------------------------|--------------------------|--------------------|------------------------------------------------|
| <i>This work</i> | $\text{Bi}_2\text{Te}_{2.7}\text{Se}_{0.3}$     | Extrusion printing   | 440 °C, 60 min               | -172                     | 224                | 662.9                                          |
| 3                | $\text{Bi}_2\text{Te}_{2.8}\text{Se}_{0.2}$     | Screen printing      | 430 °C                       | -126                     | 310                | 490                                            |
| 4                | $\text{Bi}_2\text{Te}_3/\text{PEDOT}$           | Screen printing      | 450 °C                       | -138                     | 73                 | 138.6                                          |
| 5                | $\text{Bi}_2\text{Te}_3/\text{epoxy}$           | Extrusion printing   | 250 °C, 3 h                  | -157                     | 61                 | 150                                            |
| 6                | $\text{Bi}_2\text{S}_3/\text{PANI}$             | Drop casting         | 483 K, 10 min                | -42.8                    | 0.4                | 0.07                                           |
| 7                | Poly[ $\text{K}_x(\text{Ni-ett})$ ]/PVDF        | Inkjet printing      | 363 K, 10 h                  | -44.9                    | 2.1                | 0.4                                            |
| 8                | $\text{V}_2\text{O}_5/\text{PEDOT}$             | Inkjet printing      | 100 °C overnight             | -350                     | 0.16               | 2                                              |
| 9                | $\text{Bi}_2\text{Te}_3/\text{Se}/\text{epoxy}$ | Extrusion printing   | 250/350 °C, 12 h             | -170                     | 96                 | 277                                            |
| 10               | $\text{Bi}_2\text{Te}_{2.7}\text{Se}_{0.3}$     | Aerosol jet printing | Photonic sintering,<br>1.5 s | -163                     | 270                | 730                                            |
| 11               | $\text{TiS}_2(\text{HA})_x$                     | Inkjet printing      | 110 °C                       | -70                      | 430                | 211                                            |

**Table S3.** Aerosol jet printing parameters of  $\text{Bi}_2\text{Te}_{2.7}\text{Se}_{0.3}$  TE films.

| Parameters                           | Values |
|--------------------------------------|--------|
| Nozzle diameter ( $\mu\text{m}$ )    | 200    |
| Ultrasonic atomizer flow rate (sccm) | 28-30  |
| Sheath gas flow rate (sccm)          | 15-20  |
| Platen temperature (°C)              | 85     |
| Print speed (mm/s)                   | 4.5    |

## References

- (1) Dun, C.; Kuang, W.; Kempf, N.; Saeidi-Javash, M.; Singh, D. J.; Zhang, Y. 3D Printing of Solution-Processable 2D Nanoplates and 1D Nanorods for Flexible Thermoelectrics with Ultrahigh Power Factor at Low-Medium Temperatures. *Advanced Science* **2019**, *6* (23), 1901788.
- (2) Zhang, G.; Wang, W.; Lu, X.; Li, X. Solvothermal Synthesis of V–VI Binary and Ternary Hexagonal Platelets: The Oriented Attachment Mechanism. *Crystal Growth & Design* **2009**, *9* (1), 145.
- (3) Varghese, T.; Hollar, C.; Richardson, J.; Kempf, N.; Han, C.; Gamarachchi, P.; Estrada, D.; Mehta, R. J.; Zhang, Y. High-performance and flexible thermoelectric films by screen printing solution-processed nanoplate crystals. *Scientific Reports* **2016**, *6*, 33135.
- (4) We, J. H.; Kim, S. J.; Cho, B. J. Hybrid composite of screen-printed inorganic thermoelectric film and organic conducting polymer for flexible thermoelectric power generator. *Energy* **2014**, *73*, 506.
- (5) Chen, A.; Madan, D.; Wright, P. K.; Evans, J. W. Dispenser-printed planar thick-film thermoelectric energy generators. *Journal of Micromechanics and Microengineering* **2011**, *21* (10), 104006.
- (6) Wang, Y.; Liu, G.; Sheng, M.; Yu, C.; Deng, Y. Flexible thermopower generation over broad temperature range by PANI/nanorod hybrid-based p–n couples. *Journal of Materials Chemistry A* **2019**, *7* (4), 1718.
- (7) Jiao, F.; Di, C.-a.; Sun, Y.; Sheng, P.; Xu, W.; Zhu, D. Inkjet-printed flexible organic thin-film thermoelectric devices based on p- and n-type poly(metal 1,1,2,2-ethenetetrathiolate)s/polymer composites through ball-milling. *Philosophical Transactions of the Royal Society A: Mathematical, Physical and Engineering Sciences* **2014**, *372* (2013), 20130008.
- (8) Ferhat, S.; Domain, C.; Vidal, J.; Noël, D.; Ratier, B.; Lucas, B. Organic thermoelectric devices based on a stable n-type nanocomposite printed on paper. *Sustainable Energy & Fuels* **2018**, *2* (1), 199.
- (9) Madan, D.; Wang, Z.; Chen, A.; Juang, R.-c.; Keist, J.; Wright, P. K.; Evans, J. W. Enhanced Performance of Dispenser Printed MA n-type Bi<sub>2</sub>Te<sub>3</sub> Composite Thermoelectric Generators. *ACS applied materials & interfaces* **2012**, *4* (11), 6117.
- (10) Saeidi-Javash, M.; Kuang, W.; Dun, C.; Zhang, Y. 3D Conformal Printing and Photonic Sintering of High-Performance Flexible Thermoelectric Films Using 2D Nanoplates. *Advanced Functional Materials* **2019**, *29* (35), 1901930.
- (11) Ferhat, S.; Domain, C.; Vidal, J.; Noël, D.; Ratier, B.; Lucas, B. Flexible thermoelectric device based on TiS<sub>2</sub>(HA)<sub>x</sub> n-type nanocomposite printed on paper. *Organic Electronics* **2019**, *68*, 256.
